# Supplementary material for: Facile synthesis of carbon and oxygen vacancy co-modified TiNb6O17 as an anode material for lithium-ion batteries
Source: Royal Society of Chemistry journal article supplement (doi:10.1039/d2ra01757a), 2022-01-01
Supplement: d2ra01757a1.pdf [file d2ra01757a1.pdf]

## Supporting Information for:

# Facile synthesis of carbon and oxygen vacancy co-modified $\text{TiNb}_6\text{O}_{17}$ as anode material for lithium-ion batteries

Yunfan Shang<sup>a</sup>, Suyang Lu<sup>a</sup>, Wei Zheng<sup>b</sup>, Rui Wang<sup>b</sup>, Zi Liang<sup>b</sup>, Yushuo Huang<sup>a</sup>, Jun Mei<sup>a</sup>, Ye Yang<sup>a</sup>, Wenwen Zeng<sup>a</sup> and Haoran Zhan<sup>\*a</sup>

*a. Chengdu Development Center of Science and Technology, China Academy of Engineering Physics, Chengdu 610200, China. E-mail:*

*zhanhenry20@163.com*

*b. Sichuan Global Creatives Corporation Battery Material CO., LTD, Meishan 620000, China*

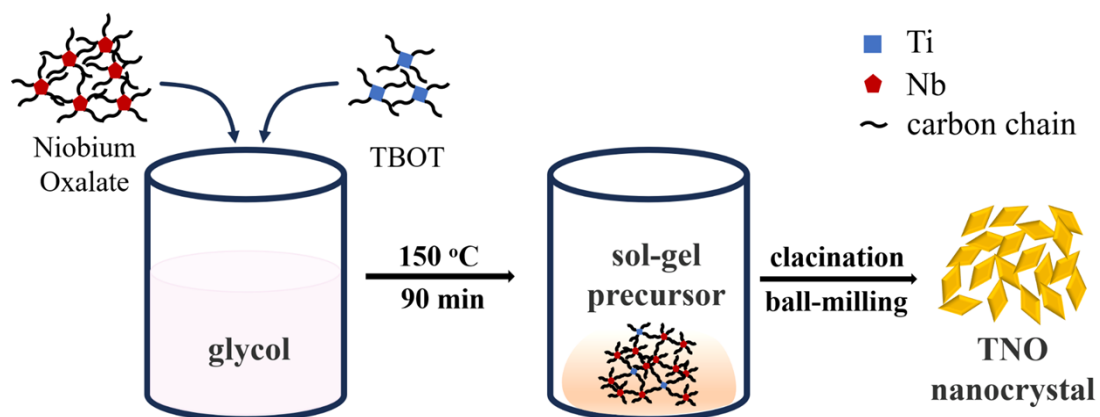

Fig.S1 Schematic illustration of the preparation process of TNOs.

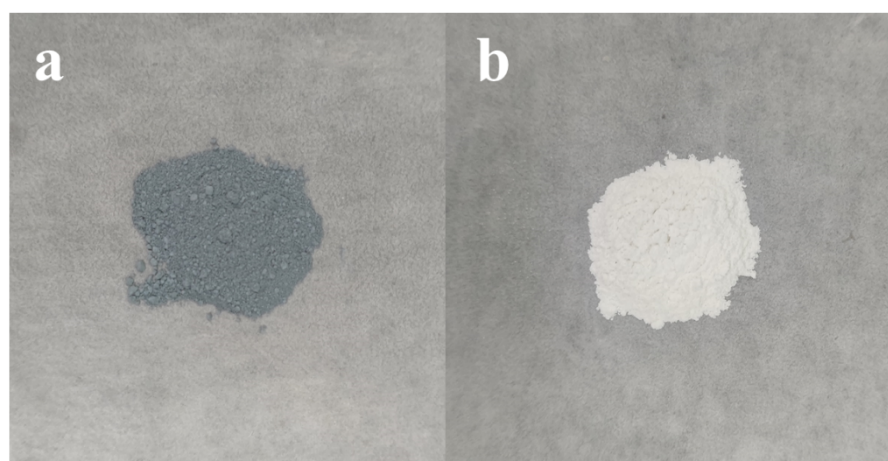

Fig.S2 Color difference of A-TNO (a) and P-TNO (b).

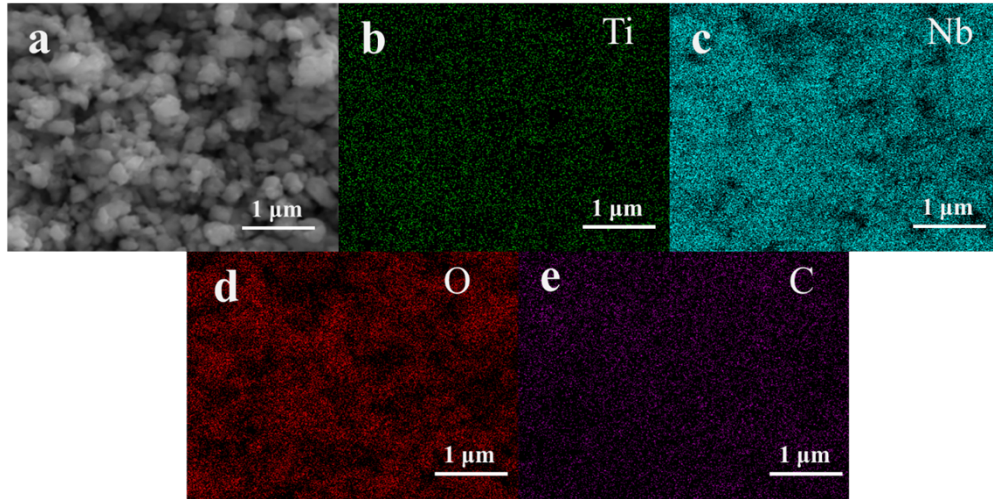

Fig.S3 EDS image of A-TNO: measured zone (a); image of Ti (b); image of Nb (c); image of O (d); image of C (e).

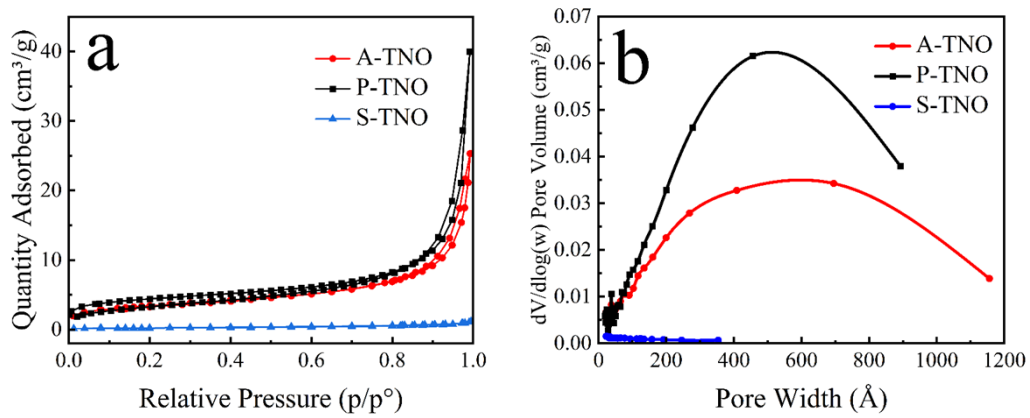

Fig.S4 Nitrogen adsorption-desorption isotherms (a) and pore width distribution (b) of A-TNO, P-TNO and S-TNO.

Table.S1 The BET Surface Area, Pore Size and Pore Volume for of A-TNO, P-TNO and S-TNO.

| Samples | BET surface area (m <sup>2</sup> /g) | Pore size (nm) | Pore Volume (cm <sup>3</sup> /g) |
|---------|--------------------------------------|----------------|----------------------------------|
| A-TNO   | 12.3                                 | 17.6           | 0.0376                           |
| P-TNO   | 15.9                                 | 21.7           | 0.0615                           |
| S-TNO   | 0.71                                 | 6.11           | 0.00146                          |

Table.S2 Fitting parameters of the equivalent circuit of A-TNO and P-TNO.

|                    | A-TNO | P-TNO |
|--------------------|-------|-------|
| R <sub>b</sub> (Ω) | 4.19  | 3.64  |
| R <sub>1</sub> (Ω) | 2.92  | 9.16  |
| R <sub>2</sub> (Ω) | 6.92  | 29.3  |
